# Supplementary material for: Synthesis and structure of the hexameric, dodecanuclear metallamacrocycle [(5-methyl-3-phenylpyrazole)2Zn2(OCH2CH2S)]6Electronic supplementary information (ESI) available: crystal structure diagrams. See http://www.rsc.org/suppdata/cc/b3/b300453h/
Source: Royal Society of Chemistry journal article supplement (doi:10.1039/b300453h), 2003-01-01
Supplement: b300453h.pdf [file b300453h.pdf]

Synthesis and structure of the hexameric,  
dodecanuclear metallamacrocycle [(5,3-  
methylphenylpyrazole)<sub>2</sub>Zn<sub>2</sub>(OCH<sub>2</sub>CH<sub>2</sub>S)]<sub>6</sub>

**Supplementary Information**

*David T. Puerta and Seth M. Cohen\**

Department of Chemistry and Biochemistry, University of California, San Diego,  
La Jolla, CA 92093-0358

Contents:

**Figure S1.** Diagram of the asymmetric unit for **1** (ORTEP, 50% probability ellipsoids). Hydrogen atoms have been omitted for clarity.

**Figure S2.** Stereoimage of Zn1 (top) and Zn1A (bottom) showing the crystallographically imposed change in chirality at each center.

**Figure S3.** Packing diagram of **1** along the crystallographic *c*-axis. The *a*- and the *b*-axes are shown in red and green, respectively.

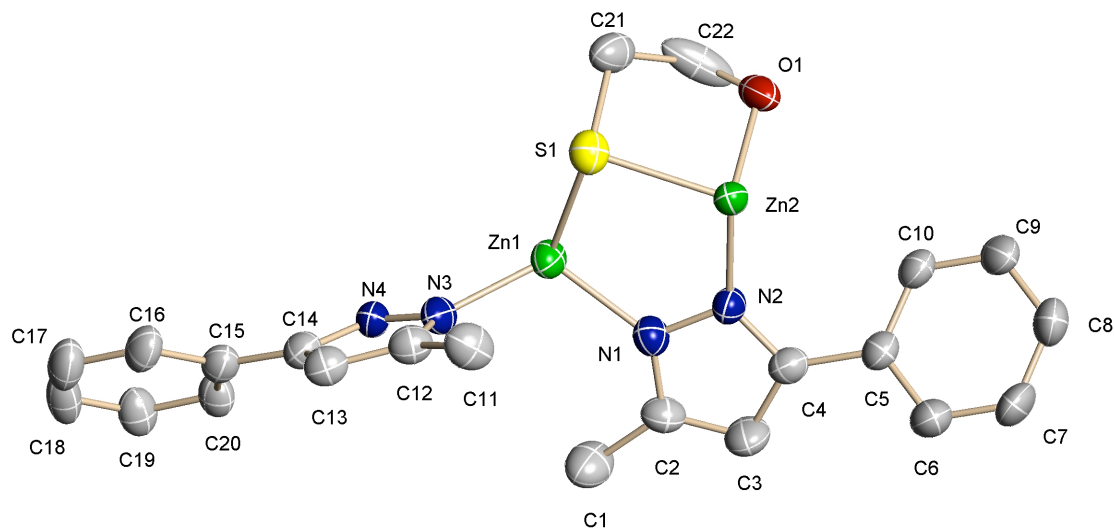

**Figure S1.** Diagram of the asymmetric unit for **1** (ORTEP, 50% probability ellipsoids). Hydrogen atoms have been omitted for clarity. Selected bond lengths (Å) and angles (°) for compound **1**: Zn(1)-N(1) 1.995(5), Zn(1)-N(3) 2.006(5), Zn(1)-O(1) 1.970(5), Zn(1)-S(1) 2.3319(17), Zn(2)-N(2) 1.971(5), Zn(2)-N(4) 1.962(5), Zn(2)-O(1) 1.988(5), Zn(2)-S(1) 2.3240(17), N(1)-Zn(1)-N(3) 116.52(19), O(1)-Zn(1)-N(1) 116.32(19), O(1)-Zn(1)-N(3) 97.09(19), O(1)-Zn(1)-S(1) 111.82(14), N(1)-Zn(1)-S(1) 105.14(14), N(3)-Zn(1)-S(1) 109.99(14), N(4)-Zn(2)-N(2) 119.06(18), N(2)-Zn(2)-O(1) 113.82(19), N(4)-Zn(2)-O(1) 98.9(2), N(4)-Zn(2)-S(1) 124.02(14), N(2)-Zn(2)-S(1) 106.58(14), O(1)-Zn(2)-S(1) 89.99(13). Note that Zn(1) binds to a symmetry equivalent atom of O(1) and Zn(2) binds to a symmetry equivalent atom of N(4).

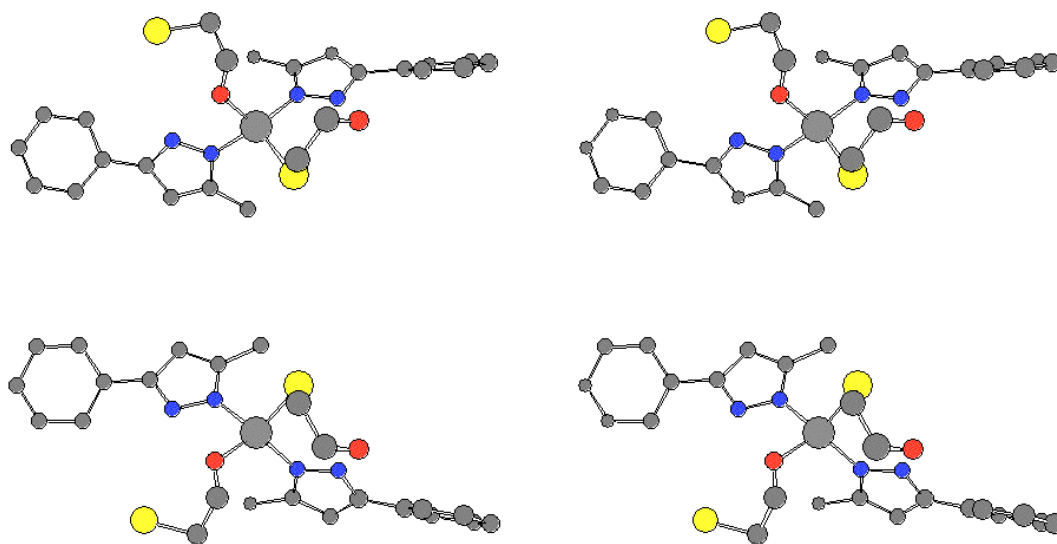

**Figure S2.** Stereoimage of Zn1 (top) and Zn1A (bottom) showing the crystallographically imposed change in chirality at each center.

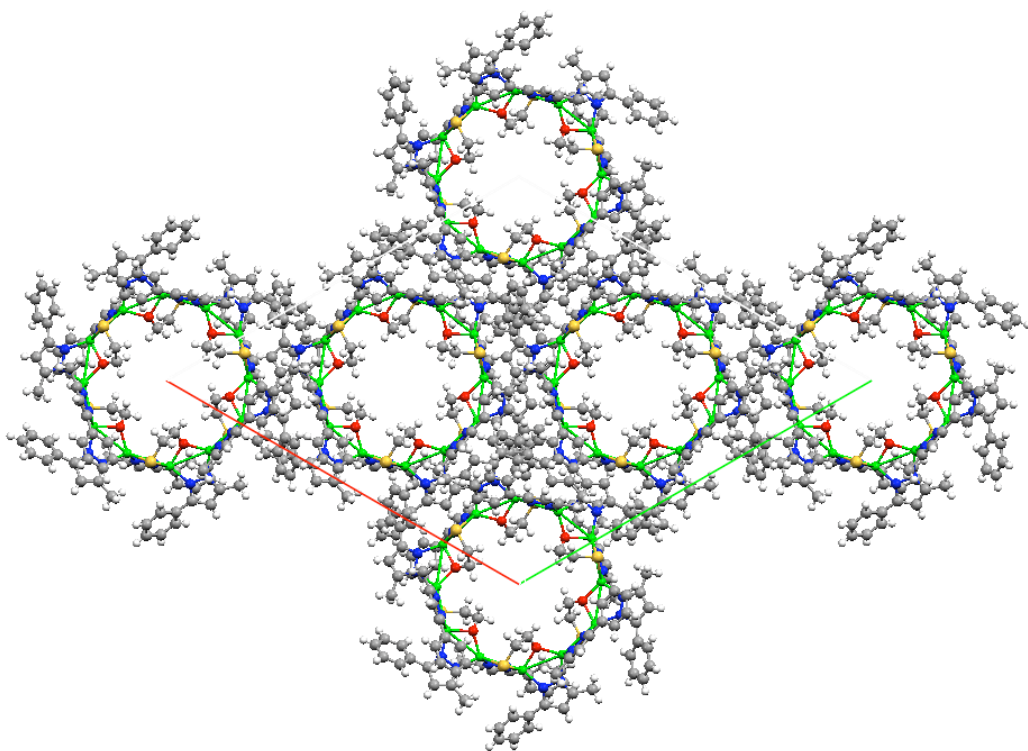

**Figure S3.** Packing diagram of **1** along the crystallographic *c*-axis. The *a*- and the *b*-axes are shown in red and green, respectively.
